# Supplementary material for: Training Health Care Professionals in Suicide Assessment, Management, and Treatment
Source: Atypon-hosted journal article supplement (doi:10.1176/appi.ps.202100571), 2022-06-23
Supplement: appi.ps.202100571.ds001.pdf [file appi.ps.202100571.ds001.pdf]

**On-Line Supplemental Table: Change in APS Participants' Reported Confidence Before and After Completing Training**

|                                                                        | Pre n | %  | Post n | %  | P     |
|------------------------------------------------------------------------|-------|----|--------|----|-------|
| <b>Identify suicide warning signs in a patient. (n=873)</b>            |       |    |        |    | <0.01 |
| Not confident/ not very confident                                      | 158   | 18 | 3      | 0  |       |
| Neutral                                                                | 183   | 21 | 25     | 3  |       |
| Extremely confident/ somewhat confident                                | 532   | 61 | 845    | 97 |       |
| <b>Know what to do if a PHQ-9 score is high. (n=872)</b>               |       |    |        |    | <0.01 |
| Not confident/ not very confident                                      | 310   | 36 | 9      | 1  |       |
| Neutral                                                                | 103   | 12 | 36     | 4  |       |
| Extremely confident/ somewhat confident                                | 459   | 53 | 827    | 95 |       |
| <b>Write a safety plan with a patient. (n=872)</b>                     |       |    |        |    | <0.01 |
| Not confident/ not very confident                                      | 390   | 45 | 37     | 4  |       |
| Neutral                                                                | 166   | 19 | 105    | 12 |       |
| Extremely confident/ somewhat confident                                | 316   | 36 | 730    | 83 |       |
| <b>Listen without judgment to a patient. (n=868)</b>                   |       |    |        |    | <0.01 |
| Not confident/ not very confident                                      | 22    | 3  | 0      | 0  |       |
| Neutral                                                                | 52    | 6  | 12     | 1  |       |
| Extremely confident/ somewhat confident                                | 794   | 91 | 856    | 99 |       |
| <b>Ask a patient directly about suicide. (n=868)</b>                   |       |    |        |    | <0.01 |
| Not confident/ not very confident                                      | 65    | 8  | 4      | 0  |       |
| Neutral                                                                | 73    | 8  | 16     | 2  |       |
| Extremely confident/ somewhat confident                                | 730   | 84 | 848    | 98 |       |
| <b>Connect a patient to additional resources. (n=864)</b>              |       |    |        |    | <0.01 |
| Not confident/ not very confident                                      | 179   | 21 | 4      | 0  |       |
| Neutral                                                                | 131   | 15 | 38     | 5  |       |
| Extremely confident/ somewhat confident                                | 554   | 64 | 822    | 95 |       |
| <b>Deliver a message to all patients about med safety. (n=871)</b>     |       |    |        |    | <0.01 |
| Not confident/ not very confident                                      | 125   | 14 | 8      | 1  |       |
| Neutral                                                                | 177   | 20 | 42     | 5  |       |
| Extremely confident/ somewhat confident                                | 569   | 66 | 821    | 94 |       |
| <b>Deliver a message to all patients about firearm safety. (n=865)</b> |       |    |        |    | <0.01 |
| Not confident/ not very confident                                      | 140   | 16 | 10     | 1  |       |
| Neutral                                                                | 171   | 20 | 49     | 6  |       |
| Extremely confident/ somewhat confident                                | 554   | 64 | 806    | 93 |       |
